# Supplementary material for: Chromosome Evolution in the Family Solanaceae
Source: Front Plant Sci. 2022 Jan 28;12:787590. doi: 10.3389/fpls.2021.787590 (PMC8832121; doi:10.3389/fpls.2021.787590)
Supplement: Supplementary file 10 [file Table_6.xlsx]

## Sheet: data sheet 5
Species	m_ratio
Nicotiana_plumbaginifolia	0
Physalis_crassifolia	0.0833333
Quincula_lobata	0.136364
Physalis_pruinosa	0.166667
Solanum_crispum	0.166667
Chamaesaracha_coronopus	0.208333
Deprea_cuyacensis	0.416667
Lycianthes_asarifolia	0.416667
Nicotiana_sylvestris	0.416667
Solanum_brevifolium	0.416667
Solanum_fraxinifolium	0.416667
Hyoscyamus_muticus	0.428571
Nicotiana_tomentosiformis	0.5
Physalis_acutifolia	0.5
Physalis_peruviana	0.5
Physalis_viscosa	0.5
Solanum_appendiculatum	0.5
Solanum_boliviense	0.5
Solanum_cajanumense	0.5
Solanum_candidum	0.5
Solanum_caripense	0.5
Solanum_muricatum	0.5
Solanum_sessiliflorum	0.5
Nierembergia_scoparia	0.555556
Deprea_nieva	0.583333
Exodeconus_flavus	0.583333
Jaborosa_sativa	0.583333
Nicotiana_otophora	0.583333
Physalis_ignota	0.583333
Solanum_acerifolium	0.583333
Solanum_adscendens	0.583333
Solanum_glaucophyllum	0.583333
Solanum_juvenale	0.583333
Solanum_pallidum	0.583333
Solanum_palustre	0.583333
Solanum_taeniotrichum	0.583333
Solanum_tenuispinum	0.583333
Solanum_wrightii	0.583333
Withania_somnifera	0.583333
Brunfelsia_uniflora	0.636364
Solanum_platense	0.636364
Anisodus_luridus	0.666667
Jaborosa_integrifolia	0.666667
Physalis_mollis	0.666667
Solanum_argentinum	0.666667
Solanum_carolinense	0.666667
Solanum_crinitum	0.666667
Solanum_fiebrigii	0.666667
Solanum_lasiocarpum	0.666667
Solanum_lidii	0.666667
Solanum_luteoalbum	0.666667
Solanum_lycocarpum	0.666667
Solanum_sibundoyense	0.666667
Solanum_stuckertii	0.666667
Solanum_thomasiifolium	0.666667
Solanum_urticans	0.666667
Solanum_vespertilio	0.666667
Capsicum_lycianthoides	0.692308
Capsicum_schottianum	0.692308
Hyoscyamus_niger	0.705882
Hyoscyamus_turcomanicus	0.705882
Hyoscyamus_pusillus	0.735294
Alkekengi_officinarum	0.75
Athenaea_fasciculata	0.75
Athenaea_sellowiana	0.75
Bouchetia_anomala	0.75
Datura_stramonium	0.75
Deprea_bitteriana	0.75
Deprea_maculatifolia	0.75
Deprea_sachapapa	0.75
Deprea_subtriflora	0.75
Deprea_zamorae	0.75
Jaltomata_procumbens	0.75
Jaltomata_sinuosa	0.75
Nierembergia_rivularis	0.75
Nolana_divaricata	0.75
Solanum_albidum	0.75
Solanum_asperolanatum	0.75
Solanum_betaceum	0.75
Solanum_capsicoides	0.75
Solanum_confusum	0.75
Solanum_felinum	0.75
Solanum_fusiforme	0.75
Solanum_habrochaites	0.75
Solanum_hirtum	0.75
Solanum_incarceratum	0.75
Solanum_multispinum	0.75
Solanum_myriacanthum	0.75
Solanum_pseudolulo	0.75
Solanum_unilobum	0.75
Witheringia_solanacea	0.75
Capsicum_recurvatum	0.769231
Capsicum_rhomboideum	0.769231
Combera_paradoxa	0.818182
Pantacantha_ameghinoi	0.818182
Przewalskia_tangutica	0.818182
Anisodus_acutangulus	0.833333
Anisodus_carniolicoides	0.833333
Anisodus_tanguticus	0.833333
Calliphysalis_carpenteri	0.833333
Datura_inoxia	0.833333
Deprea_glabra	0.833333
Deprea_parviflora	0.833333
Deprea_pauciflora	0.833333
Eriolarynx_lorentzii	0.833333
Iochroma_loxense	0.833333
Lycium_amoenum	0.833333
Lycium_australe	0.833333
Lycium_ferocissimum	0.833333
Lycium_oxycarpum	0.833333
Lycium_pallidum	0.833333
Lycium_tenue	0.833333
Nolana_stenophylla	0.833333
Nolana_villosa	0.833333
Sclerophylax_spinescens	0.833333
Solanum_aculeatissimum	0.833333
Solanum_aligerum	0.833333
Solanum_chrysotrichum	0.833333
Solanum_glutinosum	0.833333
Solanum_lycopersicoides	0.833333
Solanum_okadae	0.833333
Solanum_palitans	0.833333
Solanum_pectinatum	0.833333
Solanum_pennellii	0.833333
Solanum_robustum	0.833333
Solanum_sandwicense	0.833333
Solanum_stagnale	0.833333
Solanum_triflorum	0.833333
Solanum_violaceum	0.833333
Trozelia_umbellata	0.833333
Capsicum_tovarii	0.846154
Cestrum_elegans	0.875
Cestrum_fasciculatum	0.875
Cestrum_nocturnum	0.875
Cestrum_strigilatum	0.875
Cestrum_tomentosum	0.875
Nierembergia_graveolens	0.875
Nierembergia_repens	0.875
Nierembergia_veitchii	0.875
Sessea_corymbiflora	0.875
Nierembergia_ericoides	0.888889
Benthamiella_azorella	0.909091
Capsicum_cardenasii	0.916667
Capsicum_chacoense	0.916667
Capsicum_chinense	0.916667
Capsicum_eximium	0.916667
Capsicum_flexuosum	0.916667
Capsicum_frutescens	0.916667
Capsicum_galapagoense	0.916667
Capsicum_pubescens	0.916667
Datura_discolor	0.916667
Dunalia_brachyacantha	0.916667
Dunalia_spinosa	0.916667
Dyssochroma_viridiflorum	0.916667
Eriolarynx_fasciculata	0.916667
Eriolarynx_australis	0.916667
Iochroma_gesnerioides	0.916667
Iochroma_parvifolium	0.916667
Latua_pubiflora	0.916667
Lycianthes_rantonnetii	0.916667
Lycium_ameghinoi	0.916667
Lycium_americanum	0.916667
Lycium_boerhaviifolium	0.916667
Lycium_bosciifolium	0.916667
Lycium_cestroides	0.916667
Lycium_chanar	0.916667
Lycium_ciliatum	0.916667
Lycium_cuneatum	0.916667
Lycium_elongatum	0.916667
Lycium_fuscum	0.916667
Lycium_gilliesianum	0.916667
Lycium_infaustum	0.916667
Lycium_minutifolium	0.916667
Lycium_morongii	0.916667
Lycium_nodosum	0.916667
Lycium_rachidocladum	0.916667
Lycium_stenophyllum	0.916667
Lycium_tenuispinosum	0.916667
Lycium_vimineum	0.916667
Nolana_crassulifolia	0.916667
Saracha_punctata	0.916667
Saracha_quitensis	0.916667
Solanum_abutiloides	0.916667
Solanum_chmielewskii	0.916667
Solanum_jabrense	0.916667
Trozelia_grandiflora	0.916667
Metternichia_princeps	0.923077
Atropanthe_sinensis	0.958333
Brugmansia_sanguinea	1
Iochroma_arborescens	1
Iochroma_cyaneum	1
Iochroma_edule	1
Lycianthes_lycioides	1
Lycium_barbarum	1
Lycium_chinense	1
Nierembergia_browallioides	1
Nierembergia_calycina	1
Nierembergia_linariifolia	1
Nierembergia_pulchella	1
Nierembergia_tucumanensis	1
Sclerophylax_adnatifolia	1
Solanum_neorickii	1
Solanum_pimpinellifolium	1
Solanum_valdiviense	1
Trianaea_nobilis	1
Vassobia_breviflora	1
Vestia_foetida	1
